# Supplementary material for: A pharmacist's role in increasing access to menstrual products: an education and advocacy approach
Source: Front Reprod Health. 2024 May 17;6:1364698. doi: 10.3389/frph.2024.1364698 (PMC11140102; doi:10.3389/frph.2024.1364698)
Supplement: Supplementary Data Sheet 1 — Supplementary materials include the aggregation data analyzed to determine the average cost of period products as summarized in Table 1, as well as individual state level information on the status of taxes on period products and school requirements for period products as summarized in Figure 1. [file Datasheet1.xlsx]

## Sheet: Summarized Period Product Costs
Product	Average of Cost per Unit
Discs (Reusable)	28.4993
Cups	28.4831
Underwear (Reusable)	21.115
Underwear (Disposable)	1.48518
Discs (Disposable)	1.3136
Tampons	0.306542
Pads	0.261291
			Product	Average Cost Per Unit	Average Cost Per Period	Average Cost Per Year	Average Cost Per Lifetime
			Cups	28.4831	28.4831	28.4831	227.864
			Discs (Reusable)	28.4993	28.4993	28.4993	227.994
			Underwear (Reusable)	21.115	21.115	21.115	802.37
			Pads	0.261291	5.22583	62.7099	2382.98
			Tampons	0.306542	6.13084	73.57	2795.66
			Discs (Disposable)	1.3136	13.136	157.632	5990.01
			Underwear (Disposable)	1.48518	14.8518	178.221	6772.41
			Average	11.6377	16.7774	78.6044	2742.76

## Sheet: Individual Period Prodct Costs
Retailer	Product	Brand	Line	Absorbancy	Reusable	Package Size	Cost per Package	Cost per Unit	Link
CVS	Cups	CVS		Variable	Yes	1	22.49	22.49	https://www.cvs.com/shop/cvs-health-menstrual-cup-prodid-722537		Data was collected between July - September 2023
CVS	Cups	Diva		Variable	Yes	1	34.49	34.49	https://www.cvs.com/shop/the-divacup-menstrual-cup-prodid-1011321
CVS	Cups	CORA	The Easy-Dose-It-Cup	Variable	Yes	1	34.99	34.99	https://www.cvs.com/shop/cora-the-easy-does-it-cup-medical-grade-silicone-prodid-450873
CVS	Cups	Flex		Variable	Yes	1	37.99	37.99	https://www.cvs.com/shop/flex-discovery-kit-slim-prodid-2430009
CVS	Discs (Disposable)	Flex		Variable	No	12	16.49	1.37417	https://www.cvs.com/shop/flex-menstrual-discs-12-ct-prodid-2430008
CVS	Discs (Reusable)	Flex		Variable	Yes	1	29.99	29.99	https://www.cvs.com/shop/flex-reusable-menstrual-disc-prodid-495591
CVS	Discs (Disposable)	Flex	Plant + Mensutral Disc	Variable	No	12	13.99	1.16583	https://www.cvs.com/shop/flex-plant-menstrual-disc-12-ct-prodid-637416
CVS	Discs (Disposable)	Softdisc		Variable	No	14	13.49	0.963571	https://www.cvs.com/shop/softdisc-feminine-protection-disc-prodid-214411
CVS	Discs (Reusable)	Saalt	Regular	Variable	Yes	1	32.99	32.99	https://www.cvs.com/shop/saalt-menstrual-disc-regular-blue-prodid-566437
CVS	Discs (Reusable)	Saalt	Small	Variable	Yes	1	32.99	32.99	https://www.cvs.com/shop/saalt-menstrual-disc-small-coral-prodid-563347
CVS	Discs (Reusable)	CORA	The Perfect Fit Disc	Variable	Yes	1	34.88	34.88	https://www.cvs.com/shop/the-perfect-fit-disc-reusable-menstrual-disc-prodid-559170
CVS	Pads	CORA	The Peace-of-Mind Overnight Pad	Overnight	No	14	8.29	0.592143	https://www.cvs.com/shop/cora-the-peace-of-mind-overnight-pad-with-wings-overnight-14-ct-prodid-450495
CVS	Pads	CORA	The Peace-of-Mind Pad	Regular	No	16	8.29	0.518125	https://www.cvs.com/shop/cora-the-peace-of-mind-pad-with-organic-cotton-topsheet-regular-absorbency-16-ct-prodid-2690125
CVS	Pads	L.	Ultra thin	Regular	No	42	12.49	0.297381	https://www.cvs.com/shop/l-chlorine-free-ultra-thin-pads-organic-cotton-regular-42-ct-prodid-433811
CVS	Pads	CVS	Stayfree	Super	No	32	8.69	0.271562	https://www.cvs.com/shop/stayfree-ultra-thin-long-pads-with-wings-super-absorbency-prodid-1011262
CVS	Pads	Kotex	Clean & Secure	Super	No	40	8.29	0.20725	https://www.cvs.com/shop/u-by-kotex-security-ultra-thin-long-pads-unscented-heavy-flow-prodid-1070338
CVS	Pads	Always	Maxi	Super	No	42	8.49	0.202143	https://www.cvs.com/shop/always-long-maxi-pads-size-2-unscented-super-42-ct-prodid-800032
CVS	Pads	Always	Ultra thin	Regular	No	46	8.99	0.195435	https://www.cvs.com/shop/always-ultra-thin-size-1-pads-with-wings-unscented-regular-prodid-822103
CVS	Pads	CVS	Ultra thin	Regular	No	18	2.99	0.166111	https://www.cvs.com/shop/cvs-health-ultra-thin-pads-with-wings-regular-prodid-202309
CVS	Tampons	CVS		Super	No	36	6.49	0.180278	https://www.cvs.com/shop/cvs-health-plastic-tampons-unscented-super-18-ct-prodid-692439
CVS	Tampons	CVS	Live Better	Mixed	No	16	4.49	0.280625	https://www.cvs.com/shop/cvs-live-better-organic-cotton-tampons-with-compact-plant-based-plastic-applicator-super-plus-16-ct-prodid-2600024
CVS	Tampons	CVS	Live Better	Super Plus	No	36	8.79	0.244167	https://www.cvs.com/shop/cvs-live-better-organic-cotton-tampons-with-compact-plant-based-plastic-applicator-regular-super-36-ct-prodid-1560016
CVS	Tampons	CVS		Regular	No	18	3.89	0.216111	https://www.cvs.com/shop/cvs-health-tampons-super-plus-18-ct-prodid-318476.
CVS	Tampons	Tampax	Pearl	Mixed	No	18	6.79	0.377222	https://www.cvs.com/shop/tampax-pearl-tampons-with-leakguard-braid-unscented-regular-prodid-1011288
CVS	Tampons	Tampax	Pearl	Light	No	28	10.99	0.3925	https://www.cvs.com/shop/tampax-radiant-plastic-tampons-duopack-regular-super-absorbency-unscented-32ct-prodid-1011284
CVS	Tampons	Tampax	Radiant	Light	No	26	10.99	0.422692	https://www.cvs.com/shop/tampax-radiant-tampons-light-absorbency-unscented-28-ct-prodid-461668
CVS	Tampons	Playtex	Sport	Mixed	No	36	10.49	0.291389	https://www.cvs.com/shop/playtex-sport-tampons-multi-pack-unscented-regular-and-super-absorbency-36-ct-prodid-2250006
CVS	Tampons	CORA	Organic	Regular	No	32	11.99	0.374688	https://www.cvs.com/shop/the-comfort-fit-tampon-organic-cotton-regular-and-super-absorbency-32ct-prodid-564323
CVS	Tampons	CORA	Organic	Regular	No	16	8.29	0.518125	https://www.cvs.com/shop/cora-the-comfort-fit-tampon-organic-cotton-regular-absorbency-16-ct-prodid-2690122
CVS	Underwear (Disposable)	Always	ZZZ Period Underwear	Variable	No	7	11.79	1.68429	https://www.cvs.com/shop/always-zzz-overnight-disposable-period-underwear-for-women-7-ct-prodid-559999
CVS	Underwear (Reusable)	Saalt	Everywear	Variable	Yes	1	24.99	24.99	https://www.cvs.com/shop/saalt-everywear-heavy-asorbency-brief-leak-proof-period-underwear-prodid-563340
CVS	Underwear (Reusable)	Thinx	Teens	Variable	Yes	1	15.99	15.99	https://www.cvs.com/shop/thinx-teens-super-absorbency-cotton-bikini-period-underwear-hologram-prodid-514936
Target	Cups	Saalt		Variable	Yes	1	29	29	https://www.target.com/p/saalt-menstrual-cup-ocean-blue-regular/-/A-75663425#lnk=sametab
Target	Discs (Disposable)	Softdisc		Variable	No	14	15.99	1.14214	https://www.target.com/p/softdisc-menstrual-discs-14ct/-/A-75003204#lnk=sametab
Target	Cups	Diva		Variable	Yes	1	34.99	34.99	https://www.target.com/p/divacup-model-1-reusable-menstrual-cup/-/A-14297501#lnk=sametab
Target	Cups	Honey Pot		Variable	Yes	1	20.49	20.49	https://www.target.com/p/the-honey-pot-silicone-menstrual-cup-size-1/-/A-81177908#lnk=sametab
Target	Cups	Cora		Variable	Yes	1	29.99	29.99	https://www.target.com/p/cora-reusable-menstrual-cup-size-2/-/A-75668275#lnk=sametab
Target	Discs (Disposable)	Flex		Variable	No	24	27.99	1.16625	https://www.target.com/p/flex-menstrual-discs/-/A-86710157?preselect=84761411#lnk=sametab
Target	Discs (Disposable)	Flex		Variable	No	12	16.99	1.41583	https://www.target.com/p/flex-menstrual-discs/-/A-86710157?preselect=75665025#lnk=sametab
Target	Discs (Disposable)	Softdisc		Variable	No	14	15.99	1.14214	https://www.target.com/p/softdisc-menstrual-discs-14ct/-/A-75003204#lnk=sametab
Target	Discs (Reusable)	Saalt		Variable	Yes	1	32.99	32.99	https://www.target.com/p/saalt-reusable-menstrual-disc/-/A-87075742?preselect=84804280#lnk=sametab
Target	Discs (Reusable)	Diva		Variable	Yes	1	34.99	34.99	https://www.target.com/p/divacup-disc-reusable-menstrual-disc/-/A-87616653#lnk=sametab
Target	Discs (Reusable)	Flex		Variable	Yes	1	35.99	35.99	https://www.target.com/p/flex-reusable-menstrual-disc/-/A-84761412#lnk=sametab
Target	Discs (Reusable)	Cora		Variable	Yes	1	29.99	29.99	https://www.target.com/p/cora-reusable-menstrual-disc-1ct/-/A-82433921#lnk=sametab
Target	Tampons	Tampax	Pearl	Regular	No	18	4.79	0.266111	https://www.target.com/p/tampax-pearl-regular-absorbency-tampons/-/A-15066062?preselect=13234608#lnk=sametab
Target	Tampons	Tampax	Pearl	Regular	No	50	10.49	0.2098	https://www.target.com/p/tampax-pearl-regular-absorbency-tampons/-/A-15066062?preselect=13190965#lnk=sametab
Target	Tampons	Tampax	Pearl	Regular	No	36	7.99	0.221944	https://www.target.com/p/tampax-pearl-regular-absorbency-tampons/-/A-15066062?preselect=13369122#lnk=sametab
Target	Tampons	Up & Up		Mixed	No	36	4.49	0.124722	https://www.target.com/p/tampons-regular-absorbency-plastic-36ct-up-38-up-8482/-/A-50616712#lnk=sametab
Target	Tampons	Up & Up		Mixed	No	50	5.99	0.1198	https://www.target.com/p/multipack-tampons-plastic-50ct-up-38-up-8482/-/A-15104004#lnk=sametab
Target	Tampons	L.	Organic	Mixed	No	30	9.19	0.306333	https://www.target.com/p/l-organic-cotton-full-size-multipack-tampons-regular-super/-/A-86798619?preselect=84743590#lnk=sametab
Target	Tampons	L.	Organic	Mixed	No	42	11.79	0.280714	https://www.target.com/p/l-organic-cotton-full-size-multipack-refill-tampons-regular-super-42ct/-/A-84743601#lnk=sametab
Target	Tampons	Playtex	Sport	Mixed	No	36	7.99	0.221944	https://www.target.com/p/playtex-sport-multipack-tampons/-/A-80394593?preselect=11082262#lnk=sametab
Target	Tampons	Playtex	Sport	Mixed	No	48	9.99	0.208125	https://www.target.com/p/playtex-sport-multipack-tampons/-/A-80394593?preselect=14670716#lnk=sametab
Target	Tampons	Kotex	Click	Mixed	No	30	7.39	0.246333	https://www.target.com/p/u-by-kotex-click-tampons-multipack-compact-tampons-regular-super-absorbency-unscented/-/A-80394592?preselect=12213584#lnk=sametab
Target	Tampons	Kotex	Click	Mixed	No	45	9.99	0.222	https://www.target.com/p/u-by-kotex-click-tampons-multipack-compact-tampons-regular-super-absorbency-unscented/-/A-80394592?preselect=50567052#lnk=sametab
Target	Underwear (Disposable)	Always	Dispoasble	Variable	No	7	7.99	1.14143	https://www.target.com/p/always-zzz-period-underwear-l-xl-7ct/-/A-81782469#lnk=sametab
Target	Underwear (Reusable)	Cora	Reusable	Variable	No	1	24.99	24.99	https://www.target.com/p/cora-reusable-period-underwear-bikini-style-black/-/A-81812091?preselect=78853628#lnk=sametab
Target	Underwear (Reusable)	Thinx	Reusable	Variable	No	1	17	17	https://www.target.com/p/thinx-for-all-women-s-super-absorbency-brief-period-underwear/-/A-81637757?preselect=81550331#lnk=sametab
Target	Underwear (Reusable)	Saalt	Reusable	Variable	No	1	34.99	34.99	https://www.target.com/p/saalt-heavy-absorbency-briefs-super-soft-modal-comfort-leak-proof-period-underwear-volcanic-black/-/A-87870685?preselect=87860942#lnk=sametab
Target	Underwear (Disposable)	Rael		Variable	No	8	13.99	1.74875	https://www.target.com/p/rael-organic-cotton-overnight-period-underwear-unscented-l-xl-8ct/-/A-82458968#lnk=sametab
Walgreens	Cups	Diva		Variable	Yes	1	34.99	34.99	https://www.walgreens.com/store/c/the-divacup-model-1-reusable-menstrual-cup/ID=prod6160638-product
Walgreens	Cups	Walgreens		Variable	Yes	1	29.99	29.99	https://www.walgreens.com/store/c/walgreens-menstrual-cup-small/ID=300407680-product
Walgreens	Cups	Honey Pot		Variable	Yes	1	23.99	23.99	https://www.walgreens.com/store/c/the-honey-pot-silicone-menstrual-cup---size-1/ID=300420421-product
Walgreens	Cups	Flex		Variable	Yes	1	34.99	34.99	https://www.walgreens.com/store/c/flex-menstrual-cup,-size-02-full/ID=300407692-product
Walgreens	Discs (Disposable)	Softdisc		Variable	Yes	14	15.99	1.14214	https://www.walgreens.com/store/c/flex-softdisc-menstrual-cup/ID=prod16459-product
Walgreens	Discs (Disposable)	Flex		Variable	Yes	12	16.99	1.41583	https://www.walgreens.com/store/c/flex-menstrual-discs-one-size/ID=300402354-product
Walgreens	Discs (Reusable)	CORA	The Perfect Fit Disc	Variable	Yes	1	34.99	34.99	https://www.walgreens.com/store/c/cora-reusable-menstrual-disc/ID=300435763-product
Walgreens	Discs (Reusable)	Flex		Variable	Yes	1	34.99	34.99	https://www.walgreens.com/store/c/flex-reusable-menstrual-disc/ID=300427243-product
Walgreens	Tampons	Walgreens	Perfection Silk	Mixed	No	36	7.49	0.208056	https://www.walgreens.com/store/c/walgreens-perfection-silk-tampons-unscented/ID=300433810-product?skuId=400646047
Walgreens	Tampons	Walgreens	Perfection Silk	Regular	No	18	5.49	0.305	https://www.walgreens.com/store/c/walgreens-perfection-silk-tampons-unscented/ID=300433820-product?skuId=400655419
Walgreens	Tampons	Walgreens	Organic Cotton	Super	No	16	6.79	0.424375	https://www.walgreens.com/store/c/walgreens-organic-cotton-plastic-applicator-tampon-unscented,-super-absorbency/ID=300403948-product
Walgreens	Tampons	Tampax	Pearl	Regular	No	36	11.49	0.319167	https://www.walgreens.com/store/c/tampax-pearl-pearl-tampons-unscented/ID=300439812-product
Walgreens	Tampons	Tampax	Pearl	Regular	No	50	14.29	0.2858	https://www.walgreens.com/store/c/tampax-pearl-pearl-tampons-unscented/ID=300439813-product?skuId=sku6289187
Walgreens	Tampons	Tampax	Pocket	Regular	No	14	6.99	0.499286	https://www.walgreens.com/store/c/tampax-pocket-radiant-pocket-radiant-tampons-unscented,-regular-absorbency/ID=prod6408431-product
Walgreens	Tampons	Tampax	Radiant	Super	No	28	11.49	0.410357	https://www.walgreens.com/store/c/tampax-radiant-radiant-tampons-unscented/ID=300439810-product?skuId=sku6329275
Walgreens	Tampons	Tampax	Pearl	Ultra	No	18	11	0.611111	https://www.walgreens.com/store/c/tampax-pearl-pearl-tampons-unscented,-ultra-absorbency/ID=300439816-product
Walgreens	Tampons	Kotex	Click	Regular	No	32	10.99	0.343438	https://www.walgreens.com/store/c/u-by-kotex-click-compact-tampons-unscented/ID=300401146-product?skuId=400622564
Walgreens	Tampons	Kotex	Click	Super Plus	No	16	6.49	0.405625	https://www.walgreens.com/store/c/u-by-kotex-click-compact-tampons-unscented/ID=300401147-product
Walgreens	Tampons	Playtex	Sport	Regular	No	36	11.99	0.333056	https://www.walgreens.com/store/c/playtex-sport-regular-tampons-unscented/ID=300440862-product
Walgreens	Tampons	Playtex	Sport	Regular	No	8	3.29	0.41125	https://www.walgreens.com/store/c/playtex-sport-plastic-tampons,-regular-absorbency-unscented,-regular-absorbency/ID=300437087-product
Walgreens	Tampons	L.	Organic	Light	No	30	14.49	0.483	https://www.walgreens.com/store/c/l.-organic-cotton-tampons-unscented/ID=300424560-product?skuId=400646070
Walgreens	Tampons	L.	Organic	Mixed	No	42	16.99	0.404524	https://www.walgreens.com/store/c/l.-organic-cotton-tampons-unscented/ID=300399787-product?skuId=400646073
Walgreens	Tampons	LOLA	Organic	Regular	No	20	7.99	0.3995	https://www.walgreens.com/store/c/lola-tampons-unscented/ID=300425404-product?skuId=400646948
Walgreens	Underwear (Disposable)	Always	ZZZ Period Underwear	Variable	No	7	11.99	1.71286	https://www.walgreens.com/store/c/always-zzz-overnight-disposable-period-underwear-for-women/ID=300419696-product?skuId=400640787
Walgreens	Underwear (Reusable)	Thinx		Variable	Yes	1	16.99	16.99	https://www.walgreens.com/store/c/thinx-for-all-women's-super-absorbency-cotton-brief-period-underwear-black/ID=300436643-product?skuId=400658455
Walmart	Cups	Flex		Variable	No	1	34.97	34.97	https://www.walmart.com/ip/Flex-Reusable-Menstrual-Cup-Size-1-with-2-Free-Flex-Disposable-Menstrual-Discs/954621609?adsRedirect=true
Walmart	Cups	Honey Pot		Variable	Yes	1	19.88	19.88	https://www.walmart.com/ip/The-Honey-Pot-Company-Silicone-Menstrual-Cup-BPA-Free-Size-1-for-Light-Medium-flow-1ct/330656262?from=/search
Walmart	Cups	Shordy		Variable	Yes	2	12.97	6.485	https://www.walmart.com/ip/Shordy-Reusable-Menstrual-Cup-Set-of-2-with-Storage-Box-Small-and-Large/765871006?from=/search
Walmart	Cups	Saalt	Soft menstrual cup	Variable	Yes	1	28.99	28.99	https://www.walmart.com/ip/Saalt-Soft-Menstrual-Cup-Super-Soft-and-Flexible-Best-Sensitive-Cup-Wear-for-12-Hours-Made-in-USA-Mountain-Iris-Regular/572730649?from=/search
Walmart	Cups	Tampax	Regular Flow	Variable	Yes	1	24.99	24.99	https://www.walmart.com/ip/Tampax-REG-Flow-Menstrual-Cup-up-to-12-hrs-Comfort-Fit-protection/210765862?from=/search
Walmart	Cups	Diva		Variable	Yes	1	28.99	28.99	https://www.walmart.com/ip/DivaCup-Model-1-BPA-Free-Reusable-Menstrual-Cup-Leak-Free-Feminine-Hygiene-Tampon-and-Pad-Alternative-Up-To-12-Hours-Of-Protection/26789677?from=/search.
Walmart	Discs (Disposable)	Flex		Variable	No	12	16.88	1.40667	https://www.walmart.com/ip/Flex-Disposable-Menstrual-Discs-12-Discs/422358327?athbdg=L1200&adsRedirect=true
Walmart	Discs (Reusable)	Flex		Variable	Yes	1	34.97	34.97	https://www.walmart.com/ip/Flex-Reusable-Menstrual-Disc-1-count/705716822?adsRedirect=true
Walmart	Discs (Reusable)	Flex		Variable	Yes	36	69	1.91667	https://www.walmart.com/ip/Flex-Menstrual-Discs-Disposable-Period-Reduce-Cramps-Dryness-Beginner-Friendly-Tampon-Alternative-Capacity-5-Super-Tampons-Made-Canada-3-Pack-36-Tota/5140693708?from=/search
Walmart	Discs (Reusable)	Flex	Plant + Mensutral Disc	Variable	Yes	12	15.99	1.3325	https://www.walmart.com/ip/Flex-Plant-Menstrual-Discs-12ct/1601777818?from=/search
Walmart	Discs (Disposable)	Softdisc		Variable	No	14	29.61	2.115	https://www.walmart.com/ip/Softdisc-Menstrual-Disc-12-Hr-Period-Protection-14-Count/639831697?from=/search
Walmart	Discs (Reusable)	Saalt		Variable	Yes	1	29.99	29.99	https://www.walmart.com/ip/Saalt-Menstrual-Disc-Size-Regular-Soft-Flexible-Reusable-Medical-Grade-Silicone-Wear-12-Hours-Removal-Notch-Two-Sizes-Cup-Tampon-Alternative-Made-USA/1838891181?from=/search
Walmart	Discs (Reusable)	Cora	The Perfect Fit Disc	Variable	Yes	1	24.49	24.49	https://www.walmart.com/ip/Cora-Reusable-Leak-Protection-Period-Disc-Menstrual-Cup-Alternative-Light-or-Heavy-Flow/401496662?from=/search
Target	Pads	Rael		Overnight	No	28	13.99	0.499643	https://www.target.com/p/rael-organic-cotton-cover-regular-38-overnight-pads-duopack-unscented-28ct/-/A-85923721#lnk=sametab
Target	Pads	Rael		Regular	No	16	6.99	0.436875	https://www.target.com/p/rael-organic-cotton-cover-regular-menstrual-fragrance-free-pads-unscented-16ct/-/A-75664184#lnk=sametab
Target	Pads	L.	Overnight	Overnight	No	28	11.79	0.421071	https://www.target.com/p/l-organic-cotton-maxi-extra-long-overnight-pads/-/A-86437950?preselect=84743600#lnk=sametab
Target	Pads	Always	Radiant	Regular	No	20	7.99	0.3995	https://www.target.com/p/always-radiant-overnight-sanitary-pads-with-wings-scented-size-4/-/A-81279515?preselect=76155420#lnk=sametab
Target	Pads	Honey Pot		Regular	No	20	7.89	0.3945	https://www.target.com/p/the-honey-pot-company-herbal-regular-pads-with-wings-organic-cotton-cover-20ct/-/A-81782456#lnk=sametab
Target	Pads	Always	Pure Cotton	Overnight	No	28	10.49	0.374643	https://www.target.com/p/always-pure-cotton-overnight-pads-with-wings-size-4/-/A-86437943?preselect=84743584#lnk=sametab
Target	Pads	Cora	The Peace-of-Mind Overnight Pad	Overnight	No	28	9.69	0.346071	https://www.target.com/p/cora-organic-cotton-ultra-thin-overnight-fragrance-free-pads-with-wings-for-periods-super-absorbency-28ct/-/A-76155166#lnk=sametab
Target	Pads	Always	Infinity	Regular	No	36	7.99	0.221944	https://www.target.com/p/always-infinity-pads-regular-absorbency-size-1/-/A-15062592?preselect=13369056#lnk=sametab
Target	Pads	L.	Ultra thin	Regular	No	56	11.79	0.210536	https://www.target.com/p/l-organic-cotton-topsheet-ultra-thin-regular-absorbency-pads-with-wings/-/A-83372731?preselect=79186025#lnk=sametab
Target	Pads	Always	Ultra thin	Regular	No	46	7.99	0.173696	https://www.target.com/p/always-ultra-thin-pads-regular-absorbency-size-1/-/A-15063910?preselect=16748334#lnk=sametab
Target	Pads	Always	Ultra thin	Regular	No	62	10.49	0.169194	https://www.target.com/p/always-ultra-thin-pads-regular-absorbency-size-1/-/A-15063910?preselect=53114537#lnk=sametab
Target	Pads	Stayfree	Ultra thin	Regular	No	36	5.99	0.166389	https://www.target.com/p/stayfree-ultra-thin-pads-with-wings-unscented-regular-36ct/-/A-13404333#lnk=sametab
Target	Pads	Kotex	Clean & Secure	Heavy Ultra	No	56	7.39	0.131964	https://www.target.com/p/u-by-kotex-clean-secure-heavy-ultra-thin-feminine-fragrance-free-pads-unscented/-/A-82777843?preselect=11156326#lnk=sametab
Walgreens	Pads	Walgreens	Maxi	Overnight	No	48	5.79	0.120625	https://www.walgreens.com/store/c/walgreens-maxi-pads,-overnight,-wingless-unscented/ID=prod6188649-product
Walgreens	Pads	Always	Ultra thin	Super	No	40	8.99	0.22475	https://www.walgreens.com/store/c/always-ultra-thin-pads,-long-super,-without-wings-unscented,-size-2/ID=300433678-product
Walmart	Tampons	Tampax	Pearl	Super Plus	No	34	7.97	0.234412	https://www.walmart.com/ip/Tampax-Pearl-Tampons-Trio-Pack-Super-Super-Plus-Ultra-Absorbency-with-BPA-Free-Plastic-Applicator-and-LeakGuard-Braid-Unscented-34-Count/390837645?athbdg=L1103&adsRedirect=true
Walmart	Tampons	Tampax	Pearl	Mixed	No	38	10.47	0.275526	https://www.walmart.com/ip/Tampax-Radiant-Tampons-Duo-Pack-with-LeakGuard-Braid-Regular-Super-Absorbency-Unscented-38-Count/543758810?adsRedirect=true
Walmart	Tampons	Tampax	Radiant	Mixed	No	38	10.47	0.275526	https://www.walmart.com/ip/Tampax-Radiant-Tampons-Duo-Pack-with-LeakGuard-Braid-Regular-Super-Absorbency-Unscented-38-Count/543758810?from=/search
Walmart	Tampons	Kotex	Click	Mixed	No	30	7.34	0.244667	https://www.walmart.com/ip/U-by-Kotex-Click-Compact-Multipack-Tampons-Regular-Super-Unscented-30-Count/610023504?athbdg=L1103&adsRedirect=true
Walmart	Tampons	Kotex	Click	Regular	No	16	4.18	0.26125	https://www.walmart.com/ip/U-by-Kotex-Click-Compact-Tampons-Regular-Unscented-16-Count/508565470?athbdg=L1103&adsRedirect=true
Walmart	Tampons	Kotex	Click	Regular	No	45	9.97	0.221556	https://www.walmart.com/ip/U-by-Kotex-Click-Compact-Tampons-Regular-Unscented-45-Count/973420847?adsRedirect=true
Walmart	Tampons	Playtex	Sport	Super	No	36	7.96	0.221111	https://www.walmart.com/ip/Playtex-Sport-Super-Plastic-Applicator-Tampons-36-Ct-360-Degree-Sport-Level-Period-Protection-No-Slip-Grip-Applicator/17325209?athbdg=L1103&adsRedirect=true
Walmart	Tampons	Playtex	Clean Comfort	Mixed	No	28	19.99	0.713929	https://www.walmart.com/ip/Playtex-Clean-Comfort-Organic-Tampons-Regular-and-Super-Variety-Pack-28ct/1614267565?from=/search
Walmart	Tampons	Playtex	Sport	Mixed	No	48	9.97	0.207708	https://www.walmart.com/ip/Playtex-Sport-Multi-Pack-Regular-And-Super-Plastic-Applicator-Unscented-Tampons-48-Ct-Total-360-Degree-Level-Period-Protection-Traps-Leaks-No-Slip-Gr/162594077?athbdg=L1103&adsRedirect=true
Walmart	Tampons	Equate		Mixed	No	54	6.98	0.129259	https://www.walmart.com/ip/Equate-Tampon-Multi-Pack-with-Cardboar-Applicator-Unscented-Light-Regular-and-Super-54-Count/10423601?athbdg=L1103&from=/search
Walmart	Tampons	Equate		Mixed	No	36	5.98	0.166111	https://www.walmart.com/ip/Equate-Tampons-with-Plastic-Applicator-Unscented-Light-Regular-and-Super-36-Count/10423626?athbdg=L1102&from=/search
Walmart	Tampons	Equate		Super	No	18	3.54	0.196667	https://www.walmart.com/ip/Equate-Super-Absorbency-Unscented-Tampons-with-Plastic-Applicators-18-Ct/23944514?athbdg=L1103&from=/search
Walmart	Tampons	L.	Organic	Mixed	No	30	8.97	0.299	https://www.walmart.com/ip/L-Organic-Cotton-Tampons-Light-Regular-Absorbency-Fragrance-Free-Duo-Pack-30-Ct/783019718?athbdg=L1103&adsRedirect=true
Walmart	Tampons	L.	Organic	Regular	No	42	11.47	0.273095	https://www.walmart.com/ip/L-Organic-Cotton-Tampons-Regular-Absorbency-Fragrance-Free-42-Count/484836670?adsRedirect=true
Walmart	Tampons	Cora	Organic	Mixed	No	32	9.67	0.302187	https://www.walmart.com/ip/Cora-Compact-Applicator-Tampons-100-Organic-Cotton-S-S-32-ct/1475019874?adsRedirect=true
Walmart	Tampons	LOLA	Organic	Super	No	20	6.98	0.349	https://www.walmart.com/ip/LOLA-Super-Tampons-Compact-Plastic-Applicator-20-Ct/951728303?athbdg=L1102&from=/search
Walmart	Underwear (Disposable)	Always	ZZZ Period Underwear	Variable	No	7	7.97	1.13857	https://www.walmart.com/ip/Always-ZZZ-Overnight-Disposable-Period-Underwear-for-Women-Size-LG-7-Ct/292386132?athbdg=L1102&adsRedirect=true
Walmart	Underwear (Reusable)	Thinx		Variable	Yes	1	16.98	16.98	https://www.walmart.com/ip/Thinx-for-All-Women-s-Super-Absorbency-Cotton-Brief-Period-Underwear-Small-Black/2746551607?adsRedirect=true
Walmart	Underwear (Reusable)	Thinx		Variable	Yes	1	16.99	16.99	https://www.cvs.com/shop/thinx-for-all-women-s-super-absorbency-cotton-brief-period-underwear-black-prodid-625028
Walgreens	Pads	Always	Radiant	Regular	No	30	9.99	0.333	https://www.walgreens.com/store/c/always-radiant-pads,-regular,-with-wings-clean-scent,-size-1/ID=prod6395452-product?skuId=sku6276004
Walgreens	Pads	Always	Maxi	Super	No	26	6.99	0.268846	https://www.walgreens.com/store/c/always-maxi-pads,-long-super,-without-wings-unscented,-size-2/ID=300436197-product
Walgreens	Pads	L.	Ultra thin	Regular	No	56	16.99	0.303393	https://www.walgreens.com/store/c/l.-chlorine-free-ultra-thin-pads,-with-wings,-organic-top-sheet-unscented,-regular-absorbency/ID=300421348-product?skuId=400646077
Walgreens	Pads	LOLA	Organic	Heavy		20	7.99	0.3995	https://www.walgreens.com/store/c/lola-heavy-pads/ID=300425405-product
Walgreens	Pads	Stayfree	Ultra thin	Regular	No	36	9.29	0.258056	https://www.walgreens.com/store/c/stayfree-ultra-thin-pads,-regular-absorbency-with-wings-unscented,-regular/ID=prod6354763-product
Walgreens	Pads	Kotex	Clean & Secure	Regular	No	36	7.49	0.208056	https://www.walgreens.com/store/c/u-by-kotex-clean-&-secure-ultra-thin-pads-with-wings/ID=300413438-product
Walgreens	Pads	Kotex	Clean & Secure	Heavy	No	32	8.49	0.265313	https://www.walgreens.com/store/c/u-by-kotex-clean-&-secure-ultra-thin-pads-with-wings/ID=300413270-product
Walmart	Pads	LOLA	Ultra thin	Heavy	No	16	8.84	0.5525	https://www.walmart.com/ip/LOLA-Ultra-Thin-Pads-with-Wings-Heavy-Organic-Cotton-Top-Sheet-and-Core-16-Count/874226653?from=/search
Walmart	Pads	Always	Maxi	Overnight	No	36	10.47	0.290833	https://www.walmart.com/ip/Always-Maxi-Pads-Unscented-with-Wings-Overnight-Absorbency-Size-5-36-Ct/43826376?athbdg=L1103&from=/search
Walmart	Pads	Always	Radiant	Regular	No	28	7.97	0.284643	https://www.walmart.com/ip/Always-Radiant-Teen-Feminine-Pads-with-FlexFoam-Size-1-Regular-with-Wings-Unscented-28-Ct/21151700?athbdg=L1600&adsRedirect=true
Walmart	Pads	L.	Ultra thin	Regular	No	42	8.97	0.213571	https://www.walmart.com/ip/L-Ultra-Thin-Pads-100-Cotton-Free-Top-Layer-with-Wings-Regular-Absorbency-42-Ct/746794527?adsRedirect=true
Walmart	Pads	L.	Ultra thin	Super	No	56	11.47	0.204821	https://www.walmart.com/ip/L-Organic-Cotton-Topsheet-Ultra-Thin-Super-Absorbency-Pads-56-Ct/468660105?adsRedirect=true
Walmart	Pads	Stayfree	Ultra thin	Super	No	32	5.98	0.186875	https://www.walmart.com/ip/Stayfree-Ultra-Thin-Super-Long-Pads-With-Wings-32ct-Multi-Fluid-Protection-For-Up-To-8-Hours-With-Odor-Neutralizer/39384250?athbdg=L1600&from=/search
Walmart	Pads	Always	Ultra thin	Super	No	58	10.47	0.180517	https://www.walmart.com/ip/Always-Ultra-Thin-Pads-Unscented-with-Wings-Long-Absorbency-Size-2-58-Ct/20659449?adsRedirect=true
Walmart	Pads	Always	Ultra thin	Regular	No	46	7.97	0.173261	https://www.walmart.com/ip/Always-Ultra-Thin-Daytime-Pads-with-Wings-Size-1-Regular-Unscented-46-Ct/33469687?athbdg=L1102&from=/search
Walmart	Pads	Kotex	Clean & Secure	Regular	No	36	5.68	0.157778	https://www.walmart.com/ip/U-by-Kotex-Clean-Secure-Ultra-Thin-Pads-with-Wings-Regular-Absorbency-36-Count/216963541?athbdg=L1102&from=/search
Walmart	Pads	Equate	Maxi	Overnight	No	26	3.98	0.153077	https://www.walmart.com/ip/Equate-Maxi-Pads-with-Wings-Unscented-Overnight-Size-4-26-Count/413517294?from=/search
Walmart	Pads	Stayfree	Classic	Super	No	22	3.28	0.149091	https://www.walmart.com/ip/Stayfree-Classic-Pads-Super-Long-22-Ct/38518559?athbdg=L1103&from=/search
Walmart	Pads	Kotex	Clean & Secure	Heavy	No	56	7.34	0.131071	https://www.walmart.com/ip/U-by-Kotex-Clean-Secure-Ultra-Thin-Pads-Heavy-Absorbency-56-Count/16532749?athbdg=L1103&adsRedirect=true
Walmart	Pads	Stayfree	Maxi	Super	No	66	7.48	0.113333	https://www.walmart.com/ip/Stayfree-Maxi-Super-Pads-Wingless-Unscented-66-Ct-Absorbs-30-More-Multi-Fluid-Absorption-Comfortably-Dry-For-Up-To-8-Hours/37700735?from=/search
Walmart	Pads	Equate	Ultra thin	Regular	No	36	3.82	0.106111	https://www.walmart.com/ip/Equate-Ultra-Thin-Pads-with-Flexi-Wings-Unscented-Regular-Size-1-36-Count/10324949?athbdg=L1600&from=/search
Walmart	Pads	Equate	Maxi	Super	No	48	3.98	0.0829167	https://www.walmart.com/ip/Equate-Maxi-Pads-Super-48-Count/10423559?athbdg=L1103&from=/search

## Sheet: Period Products in Schools
State	Period Products Required in Schools	Funding Available for Period Products	Legislation (as of April 2024)
Alabama	No	Yes	N/A
Alaska	No	No	N/A
Arizona	No	Yes	N/A
Arkansas	No	No	N/A
California	Yes	Yes	https://leginfo.legislature.ca.gov/faces/billTextClient.xhtml?bill_id=202120220AB367
Colorado	No	Yes	N/A
Connecticut	Yes	Yes	https://www.cga.ct.gov/2022/fc/pdf/2022HB-05272-R000468-FC.pdf
Delaware	Yes	No	https://delcode.delaware.gov/title14/c041/sc01/index.html
Florida	No	No	N/A
Georgia	No	Yes	N/A
Hawaii	Yes	Yes	https://www.capitol.hawaii.gov/sessions/session2023/bills/HB481_HD1_.htm
Idaho	No	No	N/A
Illinois	Yes	No	https://www.ilga.gov/legislation/BillStatus.asp?DocTypeID=HB&DocNum=156&GAID=16&SessionID=110&LegID=127991
Indiana	No	No	N/A
Iowa	No	No	N/A
Kansas	No	No	N/A
Kentucky	No	No	N/A
Louisiana	No	No	N/A
Maine	No	No	N/A
Maryland	Yes	Yes	https://mgaleg.maryland.gov/mgawebsite/Legislation/Details/HB0205?ys=2021RS
Massachusetts	No	No	N/A
Michigan	No	Yes	N/A
Minnesota	Yes	Yes	https://www.revisor.mn.gov/bills/bill.php?f=HF2497&b=house&y=2024&ssn=0
Mississippi	No	No	N/A
Missouri	No	Yes	N/A
Montana	No	No	N/A
Nebraska	No	Yes	N/A
Nevada	Yes	No	https://www.leg.state.nv.us/nrs/nrs-386.html#NRS386Sec900
New Hampshire	Yes	No	https://gencourt.state.nh.us/bill_status/legacy/bs2016/bill_status.aspx?lsr=1107&sy=2019&sortoption=&txtsessionyear=2019&txtbillnumber=SB142
New Jersey	Yes	Yes	https://pub.njleg.state.nj.us/Bills/2022/S1500/1221_R3.PDF
New Mexico	Yes	Yes	https://www.nmlegis.gov/Sessions/23%20Regular/bills/house/HB0134.pdf
New York	Yes	No	https://www.nysenate.gov/legislation/bills/2023/S5913/amendment/A
North Carolina	No	Yes	N/A
North Dakota	No	No	N/A
Ohio	Yes	Yes	https://codes.ohio.gov/ohio-revised-code/section-3313.6413
Oklahoma	No	No	N/A
Oregon	Yes	Yes	https://olis.oregonlegislature.gov/liz/2021R1/Downloads/MeasureDocument/HB3294/Enrolled
Pennsylvania	No	No	N/A
Rhode Island	Yes	No	https://webserver.rilegislature.gov/Statutes/TITLE16/16-21/16-21-38.htm#:~:text=(1)%20Feminine%20products%20shall%20be,includes%20tampons%20and%20sanitary%20napkins.
South Carolina	No	No	N/A
South Dakota	No	No	N/A
Tennessee	Yes	Yes	https://wapp.capitol.tn.gov/apps/BillInfo/default.aspx?BillNumber=HB2207&GA=113
Texas	No	No	N/A
Utah	Yes	Yes	https://le.utah.gov/~2022/bills/hbillenr/HB0162.pdf
Vermont	Yes	No	https://legislature.vermont.gov/statutes/section/16/031/01432
Virginia	Yes	No	https://law.lis.virginia.gov/vacode/title22.1/chapter1/section22.1-6.1/
Washington	Yes	No	https://app.leg.wa.gov/RCW/default.aspx?cite=28A.210.420
West Virginia	No	No	N/A
Wisconsin	No	No	N/A
Wyoming	No	No	N/A

## Sheet: Tax Status on Period Products
State	Period Products Specifically Exempt from Tax
Alabama	No		No*: Period products not specifcally exempt but state has NO sales tax
Alaska	No*
Arizona	No
Arkansas	No
California	Yes
Colorado	Yes
Connecticut	Yes
Delaware	No*
Florida	Yes
Georgia	No
Hawaii	No
Idaho	No
Illinois	Yes
Indiana	No
Iowa	Yes
Kansas	No
Kentucky	No
Louisiana	Yes
Maine	Yes
Maryland	Yes
Massachusetts	Yes
Michigan	Yes
Minnesota	Yes
Mississippi	No
Missouri	No
Montana	No*
Nebraska	Yes
Nevada	Yes
New Hampshire	No*
New Jersey	Yes
New Mexico	Yes
New York	Yes
North Carolina	No
North Dakota	No
Ohio	Yes
Oklahoma	No
Oregon	No*
Pennsylvania	Yes
Rhode Island	Yes
South Carolina	No
South Dakota	No
Tennessee	No
Texas	Yes
Utah	No
Vermont	Yes
Virginia	Yes
Washington	Yes
West Virginia	No
Wisconsin	No
Wyoming	No
